# Supplementary material
Source: ML conference proceedings conference paper supplement (https://openreview.net/forum?id=eLsEjjFODE)

## Multi-Task Training Paradigm

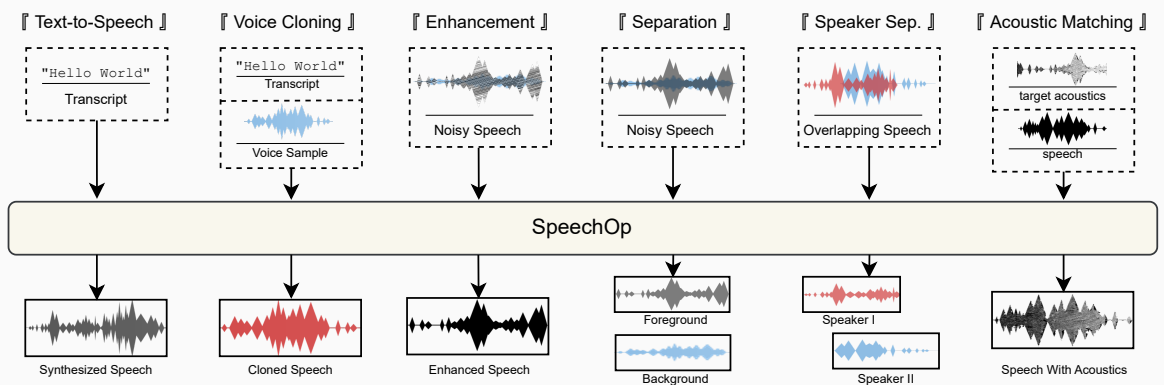

## Inference-Time Task Composition

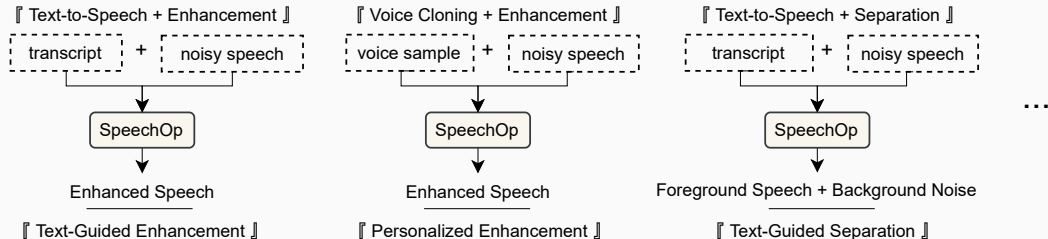

## Implicit Task Composition

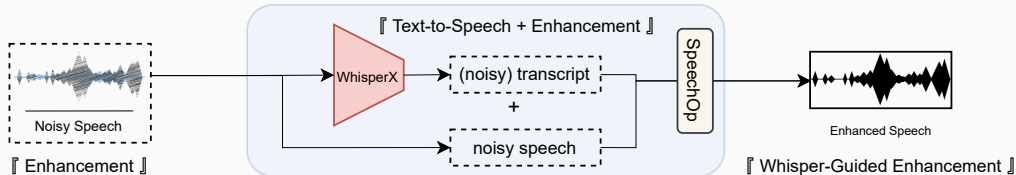

Supplement: supplementary_material [file speechop_overview.pdf › supplemental/final_demo/figure/speechop_overview.pdf]
